# Supplementary material for: Integrated Chronology, Flora and Faunas, and Paleoecology of the Alajuela Formation, Late Miocene of Panama
Source: PLoS One. 2017 Jan 20;12(1):e0170300. doi: 10.1371/journal.pone.0170300 (PMC5249130; doi:10.1371/journal.pone.0170300)
Supplement: S1 Table — (XLSX) [file pone.0170300.s001.xlsx]

## Sheet: Sheet1
Specimen	Sections	Wood Type (WT)	Family	Growth rings	Vessel groupings	Perforation plates	Intervessel pits	Vessel-ray pits	Vessel diameter	Vessel frequency	Tyloses	Tracheids	Fiber pits	Septate fibers	Fiber walls	Axial parenchyma	Ray width	Mutliseriate ray width = uniseriate portion	Ray hieght > 1mm	Ray composition	Other ray cell types	Ray frequency	Storied structure	Idioblasts	radial canals	laticifers or tanniferous tubes	crystals
63101	XS	WT 1	unknown	indistinct	solitary	?	?	?	very large	very low	?	absent	?	?	thin to thick	scanty paratracheal	?	?	?	?	?	?	?	?	?	?	?
63102	XS,TLS,RLS	WT 2	Malvaceae type a	indistinct	short radial multiples	simple	minute	?	medium	low	rare/absent	absent	?	?	thin to thick	vasicentric, winged, confluents, narrow and wide bands	1-5 cells wide	absent	present	heterocellular; procumbent and upright cells mixed; one-four rows of marginal uprights	tile cells	moderate	absent	absent	absent	absent	absent
63103	XS	Palm	Arecaceae	NA	NA	NA	NA	NA	NA	NA	NA	NA	NA	NA	NA	NA	NA	NA	NA	NA	NA	NA	NA	NA	NA	NA	NA
63104	XS,TLS,RLS	WT 3	Malvaceae type b	indistinct	short radial multiples	simple	medium	similar	large	low	rare/absent	absent	?	present	very thin	vasicentric, winged, confluent, narrow bands	1-3 (4) cells wide	absent	absent	heterocellular; procumbent and upright cells mixed, with one to many marginal upright cells	tile cells	high	absent	absent	absent	absent	?
63105	XS,TLS,RLS	WT 4	Salicaceae/Rubiaceae	indistinct	short radial multiples	simple	?	?	medium	low	common	absent	simple/minutely bordered pits	?	thin to thick	absent	1-5 cells wide	absent	absent	heterocellular; one to many rows of marginal uprights	absent	moderate	absent	absent	absent	absent	?
63106	XS,TLS,RLS	WT 5	unknown	distinct	short radial multiples	simple	minute	similar	large	low	common	absent	?	present	thin to thick	narrow bands, reticulate	2 cells wide	absent	absent	homocellular procumbent	absent	moderate	absent	absent	absent	absent	in axial parenchmya
63107	XS,TLS,RLS	WT 6	Sapindaceae	indistinct	short radial multiples	simple	minute	similar	large	very low	common	absent	present	?	thin to thick	diffuse, vasicentric	1-2 cells wide	absent	absent	homocellular procumbent	absent	moderate	absent	among fibers	absent	absent	druses in axial parenchmya
63108	XS,TLS,RLS	WT 7	unknown	indistinct	short radial multiples	simple	minute	?	large	low	common	absent	?	?	thin to thick	scanty paratracheal, vasicentric, narrow bands	1-3 cells wide	absent	absent	heterocellular; two to many rows of marginal uprights	absent	moderate	absent	absent	absent	absent	in axial parenchmya
63109	XS,TLS,RLS	WT 8	Annonaceae	indistinct	short radial multiples	simple	medium	?	large	very low	rare/absent	absent	?	?	thin to thick	wide bands, reticulate	4-8 cells wide	absent	absent	heterocellular; one row of marginal uprights	absent	moderate	absent	absent	present	absent	?
63110	XS,TLS,RLS	WT 9	Chrysobalanaceae	indistinct	solitary	simple	?	?	very large	very low	sclerotic	absent	simple/minutely bordered pits	?	thin to thick	narrow bands	uniseriate	absent	absent	heterocellular	absent	high	absent	absent	absent	absent	?
63111	XS,TLS,RLS	WT 10	unknown	indistinct	short radial multiples	simple	?	?	large	low	common	absent	?	?	thin to thick	scanty paratracheal	3-5 cells wide	absent	present	heterocellular; procumbent and upright cells mixed; one-two rows of marginal uprights	absent	moderate	absent	absent	absent	absent	present in axial parenchmya
63112	XS,TLS,RLS	WT 11	unknown	indistinct	short radial multiples	simple	medium	?	large	low	rare/absent	absent	?	?	thin to thick	scanty paratracheal	1-5 cells wide	absent	absent	heterocellular; 2 to many rows of marginal uprights	absent	high	absent	absent	absent	absent	present in axial parenchmya and fibers
63113	XS,TLS,RLS	WT 12	unknown	indistinct	long radial multiples	simple	minute	?	medium	low	common	absent	?	?	thin to thick	narrow bands	1(2) cells wide	absent	absent	homocellular upright	absent	high	absent	absent	absent	absent	?
63114	XS	WT 13	unknown	indistinct	short radial multiples	?	?	?	very large	very low	?	absent	?	?	thin to thick	narrow bands	?	?	?	?	?	high	?	?	?	?	?
63115	XS	WT 14	unknown	indistinct	short radial multiples	?	?	?	medium	?	?	absent	?	?	thin to thick	absent	1-6 cells wide	?	?	heterocellular	?	moderate	?	?	?	?	?
63116	XS	WT 15	unknown	indistinct	short radial multiples	?	?	?	large	?	?	absent	?	?	thin to thick	scanty paratracheal	1-3 cells wide	?	?	?	?	?	?	?	?	?	?
63117	XS	WT 16	unknown	indistinct	short radial multiples	?	?	?	medium	?	?	?	?	?	?	?	?	?	?	?	?	moderate	?	?	?	?	?
63118	XS,TLS,RLS	WT 17	unknown	indistinct	solitary	scalariform	minute	?	large	low	rare/absent	vasicentric	?	?	thin to thick	scanty paratracheal?	1-3 cells wide, larger rays ?	absent	absent	heterocellular; procumbent and upright cells mixed; two to many rows of marginal uprights	absent	high	absent	in rays	absent	absent	?
63119	XS	WT 18	unknown	indistinct	solitary	?	?	?	large	low	?	absent	?	?	?	scanty paratracheal	?	?	?	?	?	high	?	?	absent	?	?
63120	XS,TLS,RLS	WT 19	unknown	distinct	short radial multiples	simple	minute	similar	large	very low	rare/absent	absent	?	?	thin to thick	vasicentric, aliform, narrow bands, marginal bands	1-2 (3) cells wide	absent	absent	homocellular procumbent	absent	high	absent	absent	absent	absent	?
63121	XS,TLS,RLS	WT 20	unknown	indistinct	short radial multiples	simple	?	?	large	?	rare/absent	absent	?	?	thin to thick	scanty paratracheal	uniseriate	absent	absent	heterocellular; procumbent and upright cells mixed	absent	high	absent	absent	absent	absent	?
63122	XS	WT 21	unknown	indistinct	short radial multiples	?	?	?	large	?	?	absent	?	?	very thin/thin to thick	scanty paratracheal	?	absent	?	homocellular procumbent	?	moderate	?	?	?	?	?
63123	XS,TLS,RLS	WT 22	Fabaceae?	indistinct	short radial multiples	simple	?	?	large	low	?	absent	?	?	very thick	narrow and wide bands	2 cells wide	absent	absent	homocellular procumbent	absent	moderate	absent	absent	absent	absent	?
63124	XS,TLS,RLS	WT 23	Elaeocarpaceae	indistinct	short radial multiples	simple	medium	?	large	low	sclerotic	absent	?	?	thin to thick	scanty paratracheal	1-8 cells wide	present	absent	heterocellular; many rows of marginal uprights	absent	high	absent	absent	absent	absent	present in upright ray cells
63125	XS	WT 24	unknown	indistinct	short radial multiples	?	?	?	very large	very low	rare/absent	absent	?	?	thin to thick	narrow bands	?	?	?	?	?	high	?	?	?	?	?
63126	XS	WT 25	unknown	indistinct	short radial multiples	?	?	?	medium	low	?	?	?	?	?	narrow and wide bands	?	?	?	?	?	moderate	?	?	?	?	?
63127	XS	Palm	Arecaceae	NA	NA	NA	NA	NA	NA	NA	NA	NA	NA	NA	NA	NA	NA	NA	NA	NA	NA	NA	NA	NA	NA	NA	NA
63128	XS	WT 26	unknown	indistinct	solitary	?	?	?	large (very large)	very low	common	absent	?	?	very thick	narrow bands	1-3 cells wide, larger rays ?	?	?	heterocellular	?	high	?	?	?	?	?
63129	XS	WT 27	unknown	indistinct	short radial multiples	simple	?	?	large	?	rare/absent	absent	?	?	very thin	scanty paratracheal	?	?	?	?	?	high	?	?	?	?	?
63130	XS,TLS,RLS	WT 28	Fabaceae?	indistinct	short radial multiples	simple	?	?	medium	low	common	absent	?	present	thin to thick	vasicentric, winged aliform, confluent, narrow bands	2-5 cells wide	absent	absent	heterocellular; procumbent and uprights mixed; two to many rows of marginal uprights	absent	high	absent	absent	present	absent	present in upright ray cells
63131	XS,TLS,RLS	WT 29	unknown	indistinct	short radial multiples	simple	small	?	large	low	common	absent	?	?	thin to thick	vasicentric	1-8 cells wide	absent	absent	heterocellular; one to many rows of marginal uprights	absent	moderate	absent	absent	absent	absent	present in axial parenchyma
63133	XS,TLS,RLS	WT 30	Humiriaceae	indistinct	solitary	scalariform	?	?	large	low	common	absent	none	?	very thick	scanty paratracheal	1-2 cells wide	absent	absent	heterocellular; procumbent and upright cells mixed	absent	high	absent	absent	absent	absent	?
63134	XS,TLS,RLS	WT 31	Sapindaceae	indistinct	short radial multiples	simple	?	?	large	low	common	absent	?	?	thin to thick	scanty paratracheal, diffuse	2-3 cells wide	absent	absent	heterocellular; one row of marginal uprights	absent	moderate	absent	among fibers	absent	absent	?
63135	XS	WT 32	unknown	indistinct	short radial multiples	?	?	?	medium	low	rare/absent	absent	?	?	thin to thick	wide bands	1-3 cells wide	?	?	?	?	high	?	?	?	?	?
63138	XS,TLS,RLS	WT 33	unknown	indistinct	short radial multiples	simple	small	?	large	low	common	absent	?	?	thin to thick	rare/absent	2-3 cells wide	absent	present	heterocellular; one row of marginal uprights	absent	moderate	absent	absent	absent	absent	absent
63139	XS	Palm	Arecaceae	NA	NA	NA	NA	NA	NA	NA	NA	NA	NA	NA	NA	NA	NA	NA	NA	NA	NA	NA	NA	NA	NA	NA	NA
63142	XS	WT 34	unknown	indistinct	short radial multiples	?	?	?	large	low	rare/absent	absent	?	?	thin to thick	narrow bands, scaleriform	?	?	?	?	?	low	?	?	?	?	?
63143	XS	WT 35	unknown	indistinct	short radial multiples	?	?	?	medium	?	?	?	?	?	?	vasicentric, aliform, confluent	?	?	?	heterocellular	?	?	?	?	?	?	?
63144	XS,TLS,RLS	WT 36	unknown	indistinct	solitary	simple	?	?	large	low	rare/absent	absent	?	?	?	narrow bands	1-2 cells wide	present	present	heterocellular; many rows of marginal uprights	absent	high	absent	absent	absent	absent	?
63146	XS,TLS,RLS	WT 37	Fabaceae	indistinct	short radial multiples	simple	small	?	very large	very low	rare/absent	absent	?	?	thin to thick	vasicentric, aliform, lozenge-aliform, confluent	3(2) cells wide	absent	absent	heterocellular; one row of marginal uprights	absent	moderate	present	absent	absent	absent	druses in ray parenchyma
63148	XS,TLS,RLS	WT 38	unknown	indistinct	short radial multiples	?	small	?	large	low	rare/absent	absent	?	?	thin to thick	vasicentric, aliform, lozenge-aliform, winged, confluent	1(2) cells wide	absent	absent	heterocellular; one row of marginal uprights	absent	moderate	absent	absent	absent	absent	?

## Sheet: Sheet2
Specimen	sections	family	growth rings	mean vessel diameter	axial parenchyma
63101	XS	unknown	absent	very large	scanty paratracheal
63102	XS,TLS,RLS	Malvaceae	absent	medium	vasicentric, winged, confluents, narrow and wide bands
63103	XS	Arecaceae	NA	NA	NA
63104	XS,TLS,RLS	Malvaceae?	absent	large	vasicentric, winged, confluent, narrow bands
63105	XS,TLS,RLS	Salicaceae?	absent	medium	absent
63106	XS,TLS,RLS	Apocynaceae?	present	large	narrow bands, reticulate
63107	XS,TLS,RLS	Sapindaceae?	absent	large	diffuse, vasicentric
63108	XS,TLS,RLS	unknown	absent	large	scanty paratracheal, vasicentric, narrow bands
63109	XS,TLS,RLS	Annonaceae	absent	large	wide bands, reticulate
63110	XS,TLS,RLS	Chrysobalanaceae	absent	very large	narrow bands
63111	XS,TLS,RLS	unknown	absent	large	scanty paratracheal
63112	XS,TLS,RLS	unknown	absent	large	scanty paratracheal
63113	XS,TLS,RLS	unknown	absent	medium	narrow bands
63114	XS	unknown	absent	very large	narrow bands
63115	XS	unknown	absent	medium	absent
63116	XS	unknown	absent	large	scanty paratracheal
63117	XS	unknown	absent	medium	?
63118	XS,TLS,RLS	unknown	absent	large	scanty paratracheal?
63119	XS	unknown	absent	large	scanty paratracheal
63120	XS,TLS,RLS	unknown	absent	large	vasicentric, aliform, narrow bands, marginal bands
63121	XS,TLS,RLS	unknown	absent	large	scanty paratracheal
63122	XS	unknown	absent	large	scanty paratracheal
63123	XS,TLS,RLS	Fabaceae?	absent	large	narrow and wide bands
63124	XS,TLS,RLS	Elaeocarpaceae	absent	large	scanty paratracheal
63125	XS	unknown	absent	very large	narrow bands
63126	XS	unknown	absent	medium	narrow and wide bands
63127	XS	Arecaceae	NA	NA	NA
63128	XS	unknown	absent	large (very large)	narrow bands
63129	XS	unknown	absent	large	scanty paratracheal
63130	XS,TLS,RLS	Fabaceae?	absent	medium	vasicentric, winged aliform, confluent, narrow bands
63131	XS,TLS,RLS	unknown	absent	large	vasicentric
63133	XS,TLS,RLS	Humiriaceae	absent	large	scanty paratracheal
63134	XS,TLS,RLS	Sapindaceae	absent	large	scanty paratracheal, diffuse
63135	XS	unknown	absent	medium	wide bands
63138	XS,TLS,RLS	unknown	absent	large	rare/absent
63139	XS	Arecaceae	NA	NA	NA
63142	XS	unknown	absent	large	narrow bands, scaleriform
63143	XS	unknown	absent	medium	vasicentric, aliform, confluent
63144	XS,TLS,RLS	unknown	absent	large	narrow bands
63146	XS,TLS,RLS	Fabaceae	absent	very large	vasicentric, aliform, lozenge-aliform, confluent
63148	XS,TLS,RLS	unknown	absent	large	vasicentric, aliform, lozenge-aliform, winged, confluent
