# Supplementary material for: Integrated Chronology, Flora and Faunas, and Paleoecology of the Alajuela Formation, Late Miocene of Panama
Source: PLoS One. 2017 Jan 20;12(1):e0170300. doi: 10.1371/journal.pone.0170300 (PMC5249130; doi:10.1371/journal.pone.0170300)
Supplement: S2 Table — (XLSX) [file pone.0170300.s002.xlsx]

## Sheet: logPAAS 12_10
Supplementary Table 2. Panama REE data analyzed 2015.
Sample	Group	Region	Material	#	La	Ce	Pr	Nd	Sm	Eu	Gd	Tb	Dy	Ho	Er	Tm	Yb	Lu	∑REE
OCW-1a	OCW	Ocu	Wood	1	0.0877905	0.0643195	0.0857656	0.10254	0.141184	0.233401	0.205529	0.195083	0.206012	0.190116	0.185484	0.18639	0.17394	0.165451	3.22301
OCW-1b	OCW	Ocu	Wood	2	0.0336481	0.0282429	0.0410221	0.0505748	0.0717782	0.127927	0.0953131	0.0989065	0.106515	0.0911897	0.0955989	0.096679	0.0962646	0.087193	3.12085
OCW-2	OCW	Ocu	Wood	3	0.0159651	0.0110035	0.0155814	0.0179289	0.0242798	0.0477955	0.0348652	0.0322273	0.0349939	0.0327457	0.0318905	0.028637	0.0268336	0.0275	3.38225
OCW-3a	OCW	Ocu	Wood	4	0.0110543	0.0126876	0.013763	0.0156613	0.0252659	0.0469636	0.0317427	0.0323961	0.0364266	0.0366176	0.0424039	0.0550543	0.0679543	0.0739163	4.50191
OCW-3b	OCW	Ocu	Wood	5	0.00600832	0.00652109	0.006194	0.00775634	0.0104464	0.0266927	0.0147468	0.014526	0.016662	0.0178143	0.0251042	0.0412395	0.0577168	0.0642279	5.31566
CUW-1a	CUW	Cucaracha	Wood	6	0.0767418	0.0524683	0.0737438	0.0959269	0.145205	0.296206	0.256194	0.262818	0.31719	0.314482	0.343931	0.350146	0.329211	0.3361	9.25036
CUW-1b	CUW	Cucaracha	Wood	7	0.0383612	0.0255396	0.0356512	0.046692	0.0720868	0.1591	0.130041	0.135517	0.167236	0.173436	0.188966	0.185462	0.171904	0.17183	8.70182
CUW-2a	CUW	Cucaracha	Wood	8	0.0812343	0.0685985	0.0986956	0.126659	0.186239	0.368527	0.291428	0.305906	0.358569	0.348	0.356968	0.357277	0.330327	0.327505	11.6059
CUW-2b	CUW	Cucaracha	Wood	9	0.0595237	0.0451914	0.0620828	0.0743004	0.109032	0.227233	0.168985	0.180708	0.238674	0.231267	0.267138	0.288111	0.292394	0.314272	11.5589
CUW-3	CUW	Cucaracha	Wood	10	0.0937394	0.0572106	0.0835713	0.125942	0.222058	0.485386	0.517008	0.516675	0.6607	0.721309	0.830973	0.872741	0.940447	1.10515	17.2329
ALAW-2	ALAW	Alajuela	Wood	11	0.075973	0.0375304	0.171393	0.230955	0.451922	0.859323	0.548853	0.590762	0.628566	0.497185	0.470568	0.437827	0.382347	0.35146	16.7347
ALAW-3	ALAW	Alajuela	Wood	12	0.036158	0.0123279	0.0347958	0.0454211	0.0685218	0.132356	0.123359	0.124896	0.146497	0.138284	0.146757	0.140842	0.127729	0.134774	13.4127
ALAW-4	ALAW	Alajuela	Wood	13	0.00649113	0.00547188	0.00607169	0.00576853	0.00756786	0.01533	0.0130064	0.0130377	0.01593	0.0169051	0.0180972	0.0159827	0.0161664	0.0140674	13.1699
ALAW-6aR	ALAW	Alajuela	Wood	14	0.0321355	0.0143371	0.0405426	0.0526856	0.0863146	0.161615	0.109567	0.116744	0.127366	0.114335	0.118888	0.123862	0.121816	0.11034	15.3305
ALAW-6bR	ALAW	Alajuela	Wood	15	0.0193464	0.00815281	0.0175786	0.0217891	0.032178	0.0650118	0.0518777	0.0517273	0.0626973	0.0572634	0.0620011	0.0619654	0.0534721	0.0571442	15.6222
ALAW-6cR	ALAW	Alajuela	Wood	16	0.00778203	0.00521314	0.00663952	0.00735041	0.0101298	0.0210982	0.0179215	0.0180143	0.0215107	0.0210303	0.0210737	0.0224889	0.0216454	0.0198953	16.2218
ASP-6a	ALAS	Alajuela	Sediment	17	0.253565	0.248952	0.353581	0.449031	0.677034	1.2531	0.879605	0.876091	0.985258	0.896656	0.955244	0.987499	0.957225	0.935791	27.7086
ASD-6a	ALAS	Alajuela	Sediment	18	0.314276	0.328483	0.427546	0.530111	0.760811	1.4084	0.958874	0.950082	1.06356	0.942876	0.986365	1.02211	0.974608	0.944488	29.6126
ASD-6b	ALAS	Alajuela	Sediment	19	0.460325	0.445513	0.600125	0.729312	0.997078	1.7895	1.30716	1.23025	1.30143	1.13055	1.13914	1.11721	1.06536	1.00967	33.3226
ASP-6c	ALAS	Alajuela	Sediment	20	0.246882	0.256183	0.29729	0.358745	0.470347	0.85554	0.609418	0.576212	0.615331	0.564412	0.58604	0.577998	0.553829	0.524419	27.0926
ASP-6aF	ALAS	Alajuela	Sediment	21	0.384474	0.391557	0.597761	0.757034	1.12902	2.08269	1.42094	1.39967	1.54583	1.37615	1.4252	1.42555	1.38877	1.34595	37.6706
ASD-6aF	ALAS	Alajuela	Sediment	22	0.337757	0.368562	0.476751	0.598251	0.862353	1.5245	1.08827	1.09391	1.22113	1.10201	1.1686	1.19591	1.14209	1.12734	35.3074
ASD-6bF	ALAS	Alajuela	Sediment	23	1.50374	1.49225	2.37099	2.96833	4.11257	6.26304	4.84797	4.40522	4.38702	3.42061	3.23254	3.01448	2.71907	2.39971	70.1375
ASP-6cF	ALAS	Alajuela	Sediment	24	0.95863	1.14912	1.30008	1.61769	2.18572	3.3457	2.82351	2.61414	2.7047	2.38205	2.38116	2.25839	2.06243	1.93841	53.7217
AMW-1	ALAW	Alajuela	wood	25	0.0075544	0.00465306	0.0133546	0.0170282	0.0316709	0.0431255	0.0384532	0.0420545	0.0506805	0.0472775	0.0513526	0.0574543	0.0593875	0.0581488	25.5222
AMW-2	ALAW	Alajuela	Wood	26	0.00505529	0.00218151	0.00672979	0.00845944	0.0140598	0.0313545	0.0212079	0.0222701	0.0271382	0.027221	0.0321768	0.0363926	0.0454821	0.0505302	26.3303
ASP-3	ALAS	Alajuela	Sediment	27	0.316361	0.212085	0.354667	0.427113	0.592909	1.19359	0.819011	0.817492	0.928901	0.838038	0.894193	0.903173	0.864889	0.849258	37.0117
Gat1	GAT	Gatun	Sediment	28	7.52121	9.21942	9.30775	11.4565	17.358	24.8967	21.8457	20.066	20.8875	18.7736	18.577	17.7537	16.4668	16.4775	258.607
Gat2	GAT	Gatun	Sediment	29	5.84007	7.37892	7.64378	9.24924	14.7718	20.05	18.3376	16.7392	17.3636	15.715	15.1726	14.783	13.6887	13.7132	219.447
Gat3	GAT	Gatun	Sediment	30	2.43851	3.01205	3.0837	3.72014	5.86942	8.09948	7.54598	6.90284	7.46731	6.48375	6.37652	6.25091	5.84664	5.73232	108.83
Gat4	GAT	Gatun	Sediment	31	0.111176	0.109864	0.108318	0.120226	0.177676	0.22479	0.364795	0.241614	0.231721	0.220132	0.196805	0.239881	0.234973	0.292207	33.8742
Gat5	GAT	Gatun	Sediment	32	4.88716	6.2098	6.23718	7.6451	12.1488	16.8515	15.0966	13.3069	14.2713	12.6663	12.4172	11.985	11.0771	10.1163	186.916
Bay6	BAY	Bayano	Sediment	33	1.25457	0.916853	1.26381	1.58219	2.43144	3.67163	3.23663	3.23567	3.76924	3.62442	4.09818	4.33282	4.08047	3.82773	74.3256
Bay7	BAY	Bayano	Sediment	34	1.12741	0.800528	1.01412	1.30617	2.2802	2.93216	2.64683	2.79805	3.54908	3.6499	4.00791	4.09083	4.43592	4.69367	73.3328
Bay8	BAY	Bayano	Sediment	35	1.05673	0.788087	1.08112	1.35871	2.11527	3.50816	2.64986	2.945	3.45887	3.43551	3.7879	4.13276	4.06	3.94383	73.3218
Bay9	BAY	Bayano	Sediment	36	1.36534	1.01941	1.38417	1.66214	2.55197	4.05733	3.3608	3.49188	3.96596	4.05372	4.12508	4.38674	4.32968	4.36823	80.1225
Bay10	BAY	Bayano	Sediment	37	0.0166961	0.0142983	0.00985538	0.00892816	0.00960357	0.00446636	0.131788	0.0130961	0.0104616	0.0157528	0.0249737	0.0180346	0.0114039	0.0250116	37.3144
Bay11	BAY	Bayano	Sediment	38	0.622736	0.480107	0.603116	0.718778	1.14553	1.55612	1.5452	1.66771	1.95407	2.11162	2.40789	2.609	2.70689	2.75363	60.8824
Bay12	BAY	Bayano	Sediment	39	0.0282687	0.0220807	0.0210875	0.0208625	0.0323055	0.0378245	0.169772	0.0649403	0.0483755	0.0677296	0.0669382	0.0733753	0.05894	0.0719674	39.7845
Azu13	AZO	Azuero	Sediment	40	15.1821	10.3776	11.8803	13.7047	20.8479	23.6973	28.967	28.1335	31.5085	30.9916	31.7227	31.1401	27.1345	27.7044	372.992
Azu14	AZO	Azuero	Sediment	41	19.3214	12.5719	14.1446	16.3399	24.6723	27.5228	34.6225	34.1792	39.3497	40.2085	41.3658	40.099	35.0594	35.6875	456.144
Azu15	AZO	Azuero	Sediment	42	3.35953	2.84129	3.38128	4.33119	6.50685	8.18617	8.4212	8.73958	10.2241	9.92094	10.019	10.4009	9.37346	10.0013	147.707
Azu16	AZO	Azuero	Sediment	43	9.80945	8.71506	11.3696	14.2813	23.8597	33.0831	30.5853	31.5032	36.4641	35.3008	34.9187	33.2494	30.9791	29.7046	406.823
Azu17	AZO	Azuero	Sediment	44	5.16276	4.13206	5.27268	6.45865	11.0403	15.3598	15.5389	16.6396	20.0331	19.8285	21.2541	21.1913	20.0596	19.7403	245.712
Azu18	AZO	Azuero	Sediment	45	27.4954	26.4066	31.9893	37.4532	59.1692	69.2438	74.3852	77.0713	85.4668	78.9255	79.5045	76.3419	66.3807	65.9469	900.78
Azu19	AZO	Azuero	Sediment	46	22.3965	21.7234	26.4479	31.3269	50.7682	62.4158	64.5174	66.0515	74.0481	68.4887	69.4683	65.7405	58.7803	56.5249	784.698
Azu20	AZO	Azuero	Sediment	47	19.8663	18.4403	22.5545	26.9557	43.8541	51.8852	55.1233	55.4584	63.653	57.8066	57.093	55.6017	46.8827	44.5123	666.687
Azu21	AZO	Azuero	Sediment	48	25.8305	24.8221	30.5084	37.1952	59.323	76.3821	76.4127	74.9858	82.4041	75.8105	74.9787	69.2351	61.2288	60.0859	877.203
Azu22	AZO	Azuero	Sediment	49	9.00803	5.99012	6.75347	7.69964	11.444	12.6933	15.5819	14.9181	17.7627	16.742	17.4599	16.9181	13.5481	14.5115	230.031
Azu23	AZO	Azuero	Sediment	50	28.9981	18.9935	20.4484	23.1445	32.7635	36.2652	44.2648	40.8133	43.5912	40.9883	39.8791	35.8569	29.0443	29.682	514.733
Azu24	AZO	Azuero	Sediment	51	10.6436	6.09947	6.3875	7.25695	10.5799	13.4183	16.1766	16.5709	19.3844	20.0019	21.3843	20.6479	18.0512	18.68	256.283
1	ALAW	Alajuela	Wood	52	0.00635379	0.00561616	0.010741	0.0135583	0.0251261	0.0402491	0.0282635	0.029287	0.0323841	0.0277215	0.0258481	0.0251753	0.0223079	0.0227	52.3153
2a	ALAW	Alajuela	Wood	53	0.00573587	0.00479506	0.00648018	0.0077335	0.00988696	0.0172418	0.0163131	0.0156117	0.0159411	0.0149284	0.0146986	0.0141506	0.0130361	0.0132651	53.1698
2b	ALAW	Alajuela	Wood	54	0.00262724	0.00217937	0.00370317	0.00486787	0.00805857	0.0147555	0.0111352	0.0104961	0.0124041	0.0114349	0.0108428	0.0121704	0.0113989	0.0109581	54.127
3a	ALAW	Alajuela	Wood	55	0.0154686	0.0110979	0.0178334	0.0219677	0.0321604	0.0536018	0.0494661	0.0515584	0.0608852	0.0662079	0.0710091	0.0744148	0.0695832	0.0683326	55.6636
3b	ALAW	Alajuela	Wood	56	0.096578	0.0619618	0.105281	0.130628	0.174846	0.323802	0.258659	0.251552	0.291273	0.276252	0.296255	0.312993	0.301188	0.284512	59.1658
4	ALAW	Alajuela	Wood	57	0.0127666	0.00849501	0.0155778	0.0192962	0.0265096	0.0463155	0.041753	0.0440364	0.0514709	0.0526236	0.0566754	0.052879	0.0537557	0.0488326	57.531
5	ALAW	Alajuela	Wood	58	0.00675579	0.00485908	0.0121301	0.0150288	0.0262246	0.0407545	0.0394309	0.0474286	0.0597527	0.058223	0.0641572	0.0777284	0.0907521	0.0906047	58.6338
6	ALAW	Alajuela	Wood	59	0.0185726	0.0126916	0.0168314	0.0195608	0.0218443	0.0295982	0.0349408	0.029413	0.0331614	0.0337982	0.035126	0.033237	0.0328507	0.0307953	59.3824
9	ALAT	Alajuela	Teeth	60	1.70413	1.2947	1.7185	2.16778	2.71689	4.03607	4.4062	4.32451	5.3163	5.40276	5.82689	5.85157	5.49703	5.35449	115.618
10	ALAT	Alajuela	Teeth	61	0.382644	0.351464	0.48448	0.633389	0.850114	1.37696	1.29336	1.2079	1.41125	1.34912	1.36596	1.29891	1.17202	1.10129	75.2789
11	ALAT	Alajuela	Teeth	62	0.491107	0.300927	0.409862	0.538015	0.745503	1.28864	1.46079	1.47895	1.90354	2.04671	2.26556	2.30624	2.127	2.13567	81.4985
12	ALAT	Alajuela	Teeth	63	0.902252	0.663344	0.800159	1.01496	1.18182	1.96846	1.92968	1.76899	2.12682	2.17866	2.32645	2.25773	2.01716	2.0151	86.1516
13	ALAT	Alajuela	Teeth	64	3.63925	2.39787	3.10838	3.97906	4.42832	7.20972	7.56286	6.5412	7.36624	7.02954	6.80248	5.89221	4.85575	4.33929	139.152
14a	ALAB	Alajuela	Bone	65	0.287587	0.210741	0.247096	0.315675	0.408353	0.673826	0.69025	0.651283	0.775153	0.769458	0.809094	0.784743	0.722396	0.712521	73.0582
14b	ALAB	Alajuela	Bone	66	1.73553	1.33631	1.9012	2.41417	3.08451	4.92427	4.73095	4.36785	4.90429	4.64759	4.63264	4.36332	3.8459	3.67101	116.56
14c	ALAB	Alajuela	Bone	67	0.113681	0.0476248	0.0522019	0.0671192	0.0797895	0.14549	0.146228	0.142553	0.188167	0.2268	0.269133	0.291257	0.291789	0.321014	69.3828
15	ALAB	Alajuela	Bone	68	1.93888	0.217941	1.1218	1.37994	1.35131	2.27908	2.39728	1.87782	2.07	2.17534	2.2166	1.94747	1.61376	1.71572	92.303
16	ALAB	Alajuela	Bone	69	4.48794	1.25146	3.43709	4.48368	4.90714	8.54488	9.30373	7.53507	8.5083	8.87614	8.78309	7.51549	6.04165	6.15156	158.827
19	ALAI	Alajuela	Invert	70	0.00643382	0.00376288	0.00575244	0.00688625	0.00839857	0.0107791	0.00952511	0.0109091	0.0124011	0.0109586	0.0117863	0.0119086	0.0100907	0.00943488	70.129
20	ALAI	Alajuela	Invert	71	0.747513	0.640614	0.718895	0.803589	0.955937	1.18251	1.29718	1.33809	1.60998	1.60955	1.80437	2.06238	2.16858	2.20396	90.1431
21	ALAI	Alajuela	Invert	72	0.0371041	0.0346593	0.0394973	0.048186	0.0687602	0.106617	0.0989086	0.104795	0.123981	0.116334	0.120773	0.128435	0.114697	0.11393	73.2567
22	ALAI	Alajuela	Invert	73	0.0139887	0.0106916	0.0137168	0.0167377	0.0200173	0.0292055	0.0207099	0.0238597	0.0279661	0.0244097	0.0248909	0.0261259	0.0239954	0.0231279	73.2994
23	ALAI	Alajuela	Invert	74	0.825573	0.673073	0.879288	1.12299	1.39855	2.13102	2.38378	2.20393	2.55534	2.45385	2.45727	2.30225	2.06745	1.96396	99.4183
24	ALAI	Alajuela	Invert	75	0.0136732	0.00969877	0.0130325	0.0151662	0.0215936	0.0304609	0.0251785	0.0258182	0.0329086	0.0319546	0.0314484	0.0317654	0.02861	0.028607	75.3399
25	ALAI	Alajuela	Invert	76	0.135445	0.0995465	0.132532	0.162751	0.22222	0.369068	0.344365	0.337066	0.384452	0.379032	0.397373	0.382074	0.356488	0.353042	80.0555
26	ALAI	Alajuela	Invert	77	0.0183917	0.0122587	0.0139923	0.0169836	0.0242566	0.0413073	0.0418062	0.0524922	0.0694193	0.0767719	0.0898175	0.0990198	0.101971	0.105279	77.7638
